# Supplementary material for: Identification of metabolic biomarkers in patients with type 2 diabetic coronary heart diseases based on metabolomic approach
Source: PubMed Central journal article supplement (PMC4965763; doi:10.1038/srep30785), 2016-07-29
Supplement: srep30785-s1.pdf [file srep30785-s1.pdf]

## Supplementary files

### Identification of metabolic biomarkers in patients with type 2 diabetic coronary heart diseases based on metabolomic approach

Xinfeng Liu<sup>1</sup>, Jian Gao<sup>2</sup>, Jianxin Chen<sup>2</sup>, Zhiyong Wang<sup>2</sup>, Qi Shi<sup>2</sup>, Hongxue Man<sup>1</sup>,  
Shuzhen Guo<sup>2</sup>, Yingfeng Wang<sup>1</sup>, Zhongfeng Li<sup>1,2,\*</sup> & Wei Wang<sup>2,\*</sup>

1. Department of Chemistry, Capital Normal University, Beijing 100048, China.

2. Beijing University of Chinese Medicine, Beijing 100029, China.

---

Xinfeng Liu, Jian Gao and Jianxin Chen contributed equally to this work.

\* Correspondence author:

Zhongfeng Li: Address: Department of Chemistry, Capital Normal University, No.105  
Xisanhuanbeilu, Haidian District, Beijing 100048, China; E-mail: lizf@cnu.edu.cn; Tel:  
+86-10-68902655.

Wei Wang: Address: Beijing University of Chinese Medicine, No.11 Beisanhuandonglu,  
Chaoyang District, Beijing 100029, China; E-mail: wangwei@bucm.edu.cn; Tel:  
+86-010-64286508.

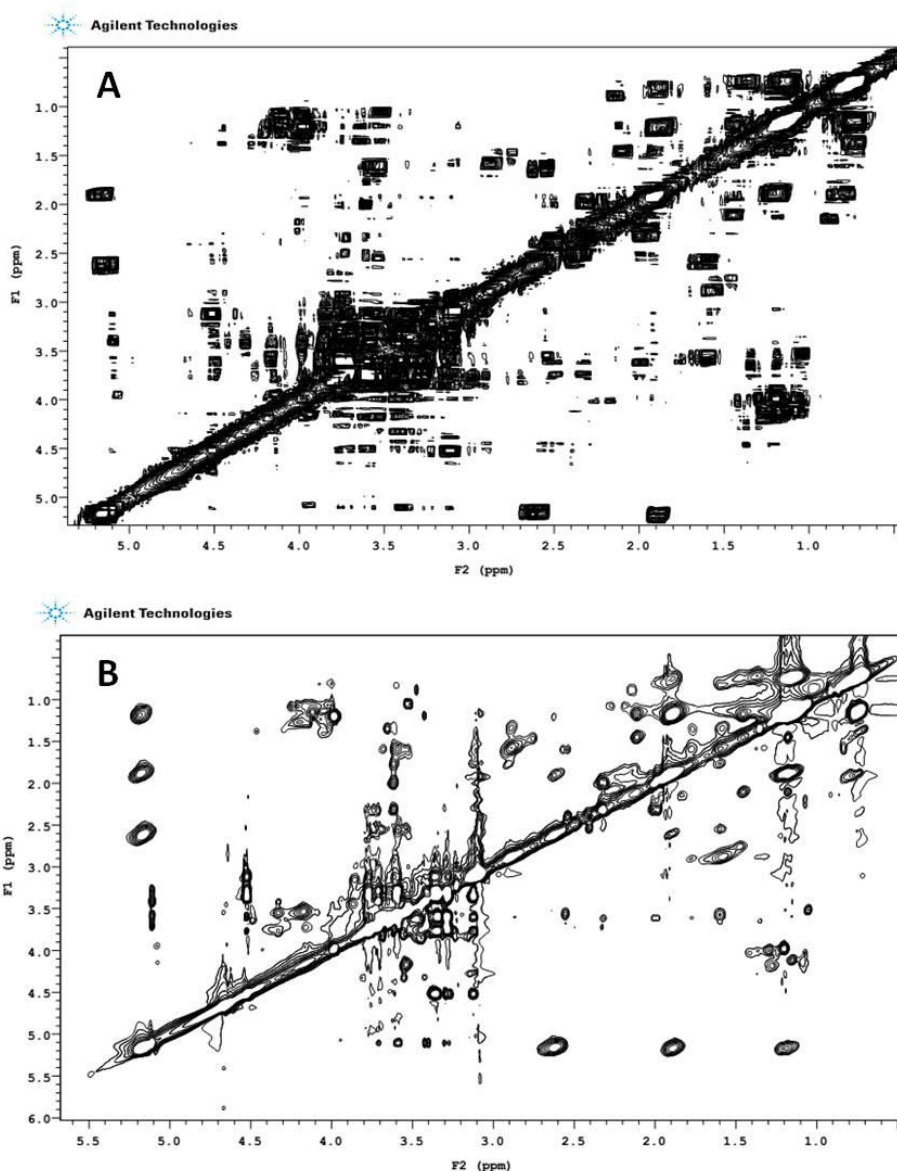

Figure. S1. NMR spectra of the aliphatic region of plasma sample (mixture of 30 metabolites) obtained with the following conditions: (A) gCOSY spectrum recorded in 5h with 32scans and 256 t1 increments. (B) TOCSY spectrum recorded in 11h with 64 scans and 256 t1 increments. All the samples were analyzed at 298 K using a VARIAN VNMRS 600 MHz NMR SPECTROMETER operating (Varian Inc, Palo Alto, Calif) at 599.871 MHz using a 5mm inverse-proton (HX) triple resonance probe with z-axis gradient coil.

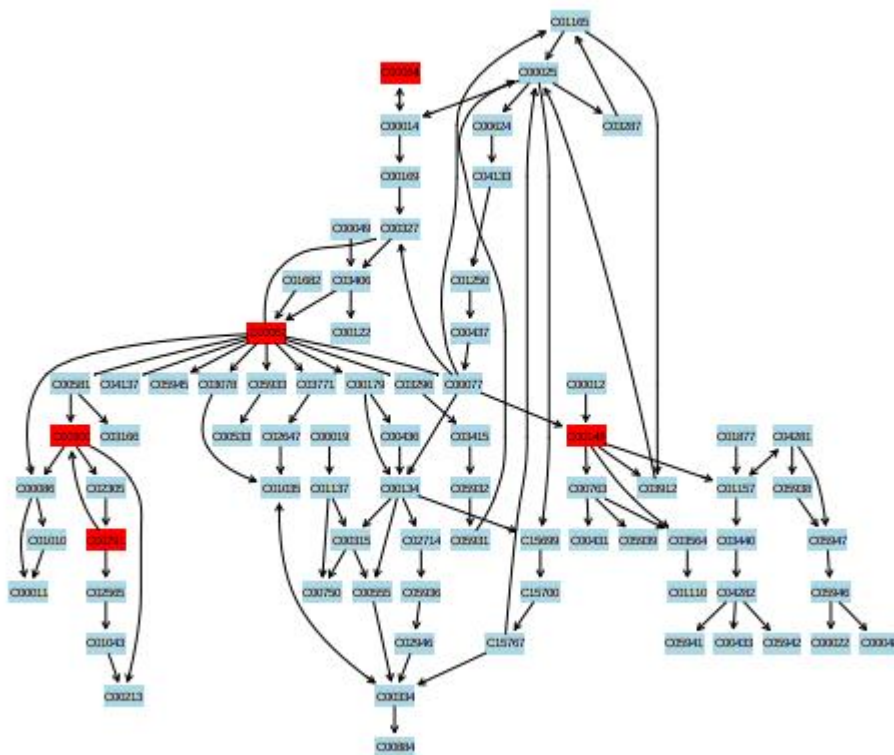

**Figure S2. Pathways of Arginine and proline metabolism**

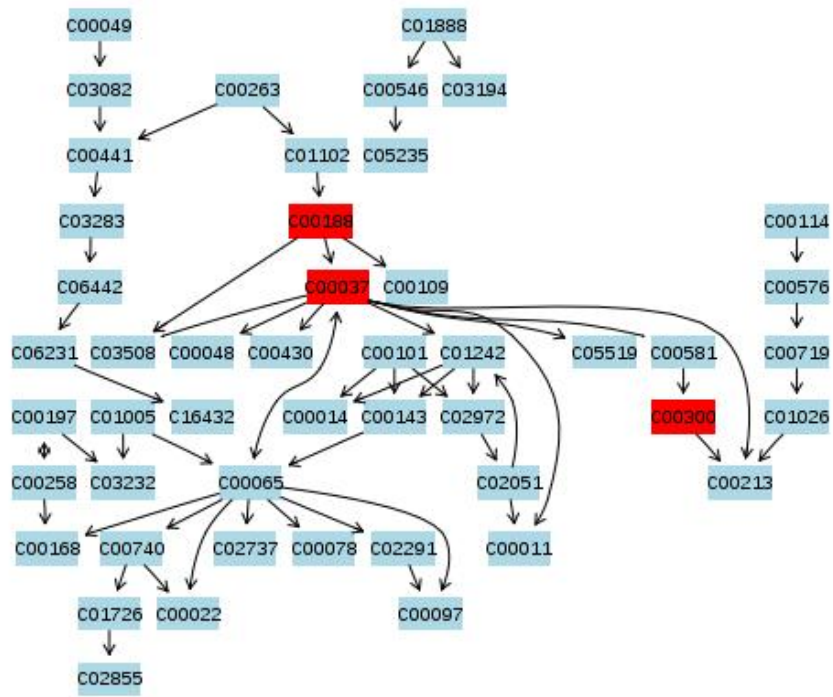

Figure S3. Pathways of Glycine, serine and threonine metabolism

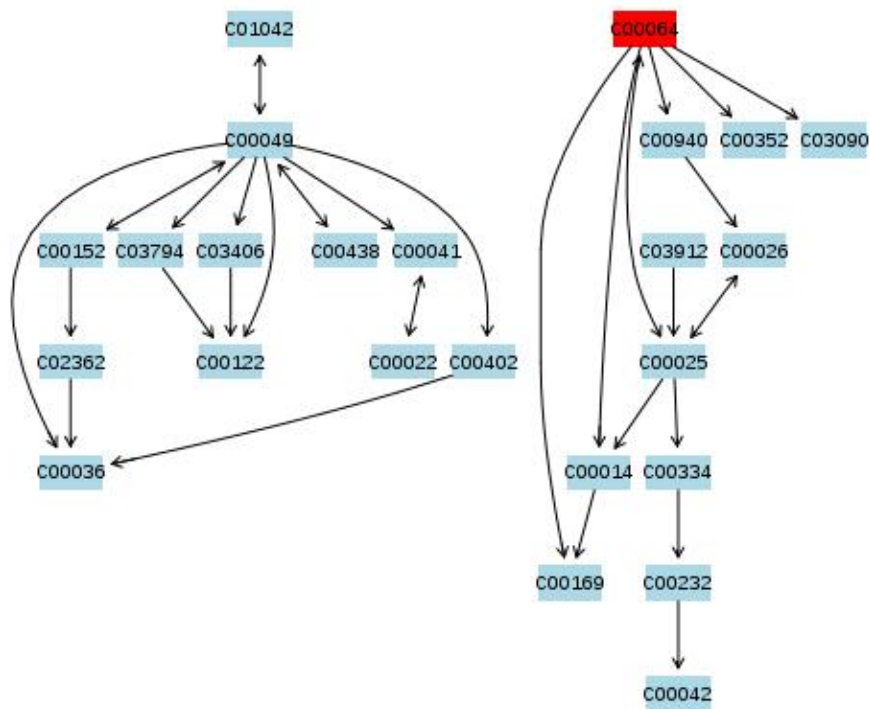

Figure S4 Pathways of Alanine, aspartate and glutamate metabolism

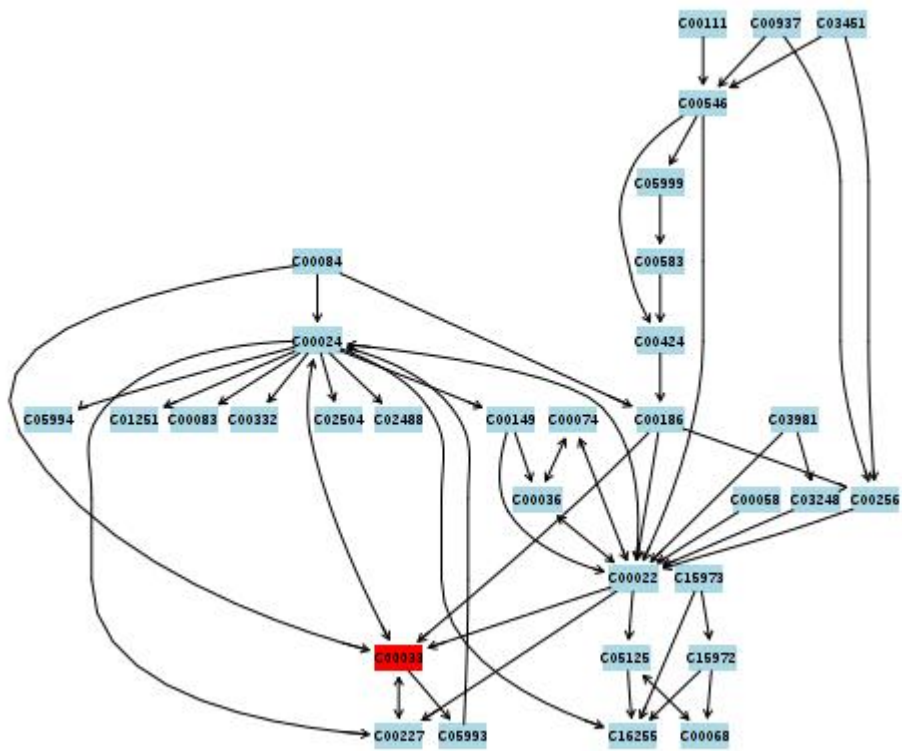

Figure S5. Pyruvate metabolism

**Table S1. Results from Pathway Analysis with MetPA from plasma**

| <b>Pathway Name</b>                         | <b>Total compounds</b> | <b>Expected</b> | <b>Hits</b> | <b>Raw p</b> | <b>FDR</b> | <b>impact</b> | <b>metabolites</b>                                 |
|---------------------------------------------|------------------------|-----------------|-------------|--------------|------------|---------------|----------------------------------------------------|
| Glycine, serine and threonine metabolism    | 48                     | 0.31907         | 3           | 0.003474     | 0.05559    | 0.28506       | threonine , creatine , glycine                     |
| Arginine and proline metabolism             | 77                     | 0.51184         | 5           | 9.75E-05     | 0.0039     | 0.26671       | glutamine, arginine, creatine, creatinine, proline |
| Alanine, aspartate and glutamate metabolism | 24                     | 0.34732         | 1           | 0.14857      | 0.66245    | 0.20703       | glutamine                                          |
| Pyruvate metabolism                         | 32                     | 0.21271         | 1           | 0.14857      | 0.66245    | 0.20703       | acetate                                            |

Total is the total number of compounds in the pathway; the hits is the actually matched number from the user uploaded data; the raw p is the original p value calculated from the enrichment analysis; the impact is the pathway impact value calculated from pathway topology analysis.
